# Supplementary material for: Alcalase-Assisted Mytilus edulis Hydrolysate: A Nutritional Approach for Recovery from Muscle Atrophy
Source: MDPI journal article supplement (doi:10.3390/md21120623), 2023-11-29

## Supplementary materials

### Materials and methods

#### 1.1 HPLC analysis of AMH

The freeze-dried AMH was reconstituted in distilled water (DW) to achieve a concentration of 100 mg/mL. The solution was then subjected to a 1-hour storage at a temperature of -80 °C, followed by a combination with 0.4% formic acid (FA) in ethyl alcohol at a ratio of 1:9 (v/v). The resulting mixture was subsequently placed in a centrifuge (operating at 4 °C and 13,000 rpm), and the supernatant was carefully collected. This collected supernatant underwent an evaporation process using a stream of nitrogen gas until complete dryness was achieved. After achieving complete dryness, the sample was introduced into a solution comprising 1 mL of 4% H<sub>3</sub>PO<sub>4</sub> in DW (v/v). This solution was then applied to an OASIS MAX® Solid Phase Extraction (SPE) column from Waters (Ireland), following the recommended 'OASIS PST Protocol' provided by the manufacturer. In a concise overview of the process, the SPE column was sequentially subjected to two equilibration solutions: firstly, 100% methanol, and secondly, DW. The initial equilibration was followed by loading the sample onto the SPE column. Subsequently, the sample loaded SPE column underwent two distinct washing steps: the first wash involved 5% NH<sub>4</sub>OH, while the second wash employed a solution containing 20% acetonitrile (ACN). Upon completing these washing steps, the purified sample was eluted using a solution containing 75% ACN in DW, augmented with 1% FA. The chromatographic separation was carried out using a poroshell 120 EC-C18 column (4.6 mm × 100 mm, 4.0 µm, Agilent, USA). The injection volume was 10 µL and the detection was performed at 280 nm wavelength using UV-Vis detector. UPLC elution step was performed under these conditions: 100% B for 5 min, 50% B up to 60 min, 10% B up to 80 min, 100% B up to 95 min. followed by 10 minutes of column re-equilibration.

#### Supplementary Figure Legends

Figure S1. HPLC analysis of the AMH (100 mg/mL). (a) Blank (b) Fraction-1: AMH in 5% Ammonium 241 water (NH<sub>4</sub>OH) (c) Fraction-2: AMH in 20 % Acetonitrile and (d) Fraction-3: AMH in 1% Formic 242 acid. A UV detector was used for the analysis and the detection wavelength was 280 nm

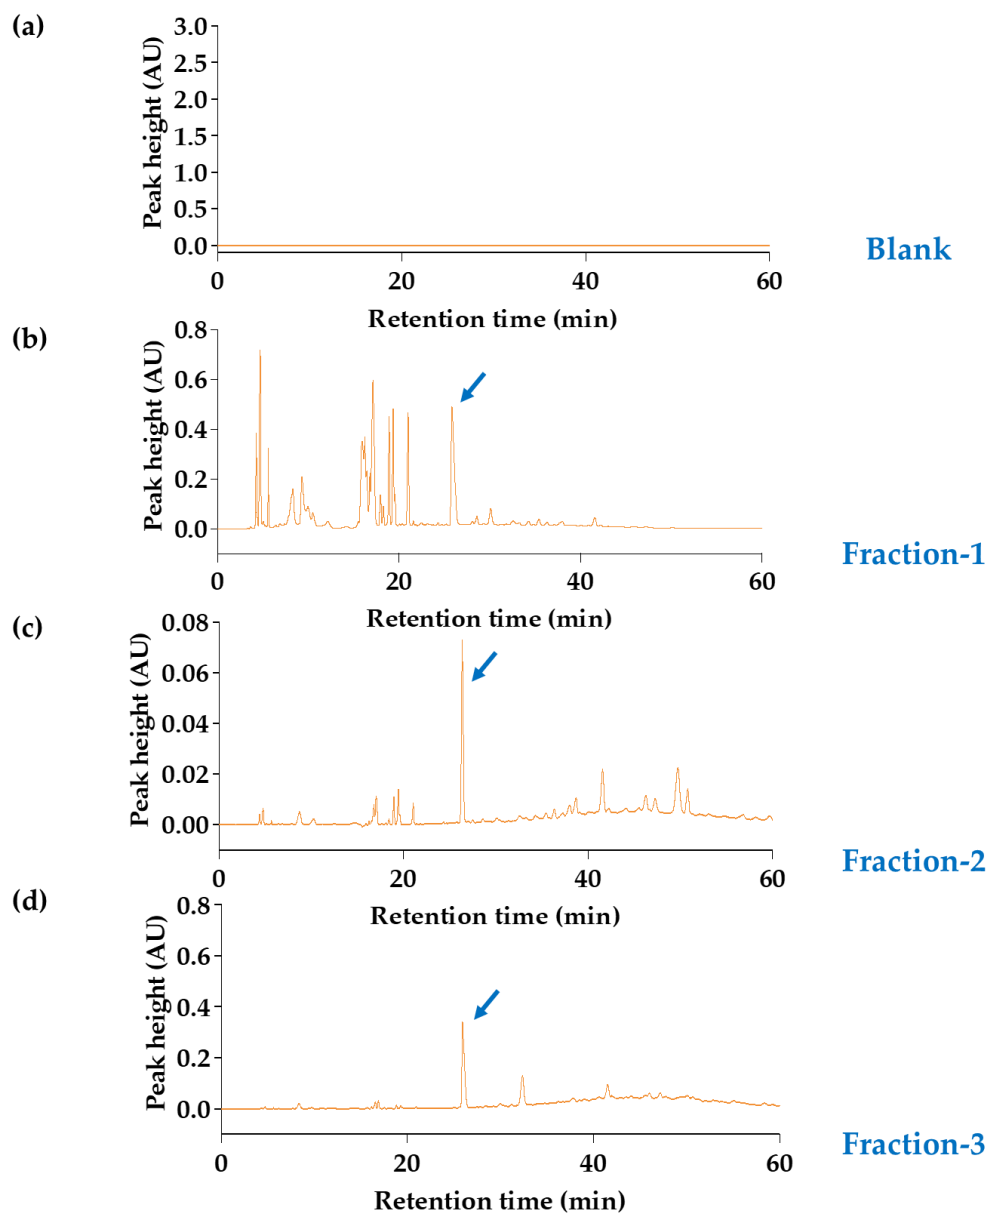

Supplement: s1 [file s1]
